# Supplementary material for: TDP-43 and Alzheimer’s Disease Pathology in the Brain of a Harbor Porpoise Exposed to the Cyanobacterial Toxin BMAA
Source: MDPI journal article supplement (doi:10.3390/toxins16010042), 2024-01-12
Supplement: s1 [file s1]

# TDP-43 and Alzheimer's Disease Pathology in the Brain of a Harbor Porpoise Exposed to the Cyanobacterial Toxin BMAA

**Table S1.** Primer designs based on *T. truncatus* and *D. delphis* sequence.

| Gene Symbol    | Gene Name                          | Assay ID | Assay Name | SeqAC          | Transcript variant | Amplicon Length | Location |
|----------------|------------------------------------|----------|------------|----------------|--------------------|-----------------|----------|
| <b>APP</b>     | Amyloid $\beta$ precursor protein  | APGZHYX  | APP_1      | XM_019922563.1 | X1                 | 64              | 550      |
|                |                                    | APGZHYX  | APP_1      | XM_019922564.1 | X2                 | 64              | 550      |
| <b>C9orf72</b> | Chromosome 9 open reading frame 72 | APKA64T  | C9ORF72_1  | XM_004318999.2 |                    | 61              | 817      |
| <b>GRN</b>     | Granulin precursor                 | APRWHFG  | GRN_1      | XM_019939325.1 |                    | 64              | 158      |
| <b>MAPT</b>    | Microtubule associated protein tau | APU66KC  | MAPT_1     | XM_019944330.1 | X1                 | 59              | 397      |
|                |                                    | APU66KC  | MAPT_1     | XM_019944331.1 | X2                 | 59              | 397      |
|                |                                    | APU66KC  | MAPT_1     | XM_019944332.1 | X3                 | 59              | 310      |
|                |                                    | APU66KC  | MAPT_1     | XM_019944333.1 | X4                 | 59              | 397      |
|                |                                    | APU66KC  | MAPT_1     | XM_019944334.1 | X5                 | 59              | 397      |
|                |                                    | APU66KC  | MAPT_1     | XM_019944335.1 | X6                 | 59              | 310      |
|                |                                    | APU66KC  | MAPT_1     | XM_019944336.1 | X7                 | 59              | 397      |
|                |                                    | APU66KC  | MAPT_1     | XM_019944337.1 | X8                 | 59              | 310      |
|                |                                    | APU66KC  | MAPT_1     | XM_019944338.1 | X9                 | 59              | 110      |
|                |                                    | APU66KC  | MAPT_1     | XM_019944339.1 | X10                | 59              | 110      |
| <b>PSEN1</b>   | Presenilin 1                       | APYMNA3  | PSEN1_2    | XM_019921707.1 | X1                 | 67              | 1855     |
|                |                                    | APYMNA3  | PSEN1_2    | XM_019921714.1 | X2                 | 67              | 1843     |
| <b>PSEN2</b>   | Presenilin 2                       | AP2XCFX  | PSEN2_2    | XM_019920287.1 |                    | 55              | 1812     |
| <b>TARDBP</b>  | TAR DNA binding protein            | AP7DT6P  | TARDBP_1   | XM_019930884.1 | X1                 | 67              | 822      |
|                |                                    | AP7DT6P  | TARDBP_1   | XM_019930886.1 | X3                 | 67              | 801      |
| <b>RPS9</b>    | Ribosomal protein S9               | AP324ZV  | RPS9_1     | EU638309.1     | partial cds        | 55              | 67       |
|                |                                    | AP324ZV  | RPS9_1     | XM_019927380.1 | X1                 | 55              | 207      |
|                |                                    | AP324ZV  | RPS9_1     | XM_004332149.2 | X2                 | 55              | 124      |
|                |                                    | AP324ZV  | RPS9_1     | XM_019927381.1 | X3                 | 55              | 329      |
